# Supplementary material
Source: MDPI journal article supplement (https://www.mdpi.com/2227-9717/11/2/457)
Supplement: s1 [file s1]

## Supporting Information

### Conceptual Process Design to produce bio-acrylic acid via gas phase dehydration of lactic acid produced from carob pod extracts

V.M. Ortiz Martínez<sup>a</sup>, María I. Saavedra<sup>a</sup>, M.J. Salar García<sup>\*a</sup>, C. Godínez<sup>a</sup>, L.J. Lozano-Blanco<sup>a</sup>, S. Sanchez-Segado<sup>a,\*</sup>

<sup>a</sup> Department of Chemical and Environmental Engineering, Technical University of Cartagena, C/ Dr. Fleming s/n, 30202 Cartagena, Spain

#### S1. Determination of invertase kinetics

| C <sub>glucose</sub> (mol/L) | Ln C  | r (mol glucose/L min) | Ln r  |
|------------------------------|-------|-----------------------|-------|
| 0.04                         | -3.22 | 0.0027                | -5.91 |
| 0.066                        | -2.72 | 0.00472               | -5.35 |
| 0.097                        | -2.33 | 0.00652               | -5.03 |
| 0.126                        | -2.07 | 0.00719               | -4.93 |
| 0.177                        | -1.73 | 0.00862               | -4.75 |
| 0.285                        | -1.25 | 0.0103                | -4.57 |

**Table S1.** Rate of sucrose hydrolysis by invertase.

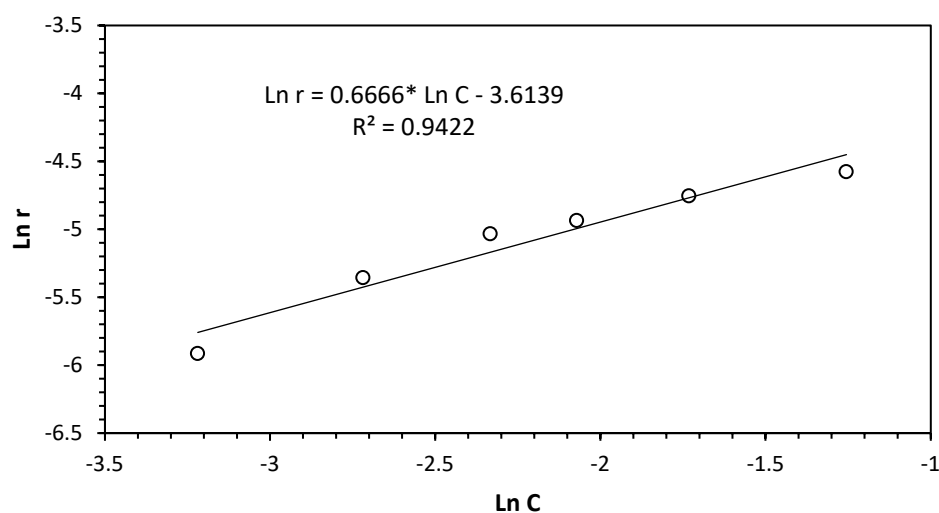

**Figure S1.** Kinetic model fitting to experimental data

From the general expression  $\ln r = \ln k + n * \ln C$ , it can be seen that  $n \approx 0.66$  and  $k = 0.027$ . So the kinetic expression takes the form:

$$r = 0.027 C_{glucose}^{0.66}$$

## S2. Equipment summary

| Area-000     |                                      |                                                                       | Carob Pod Storage        |                 |                    |
|--------------|--------------------------------------|-----------------------------------------------------------------------|--------------------------|-----------------|--------------------|
|              |                                      |                                                                       | Install factor           | Number of Units | Installed Cost (€) |
| ST-000       |                                      |                                                                       |                          |                 | 1720591            |
| Total A-000  |                                      |                                                                       |                          |                 | 1720591            |
| Area-100     |                                      |                                                                       | Sugars Extraction        |                 |                    |
| Equipment ID | Equipment Title                      | Description                                                           | Install factor           | Number of Units | Installed Cost (€) |
| C-101        | Roller Crusher                       | Roll gap 1 mm, Capacity 8.5 Tn/h, Power: 3.15 kWh, carbon steel       | 1.7                      | 1               | 24413              |
| EX-101       | Stirred reactor                      | V: 35 m <sup>3</sup> , Power: 6.5kWh, carbon steel                    | 1.5                      | 1               | 489030             |
| EX-102       | Stirred reactor                      | V: 35 m <sup>3</sup> , Power: 6.5kWh, carbon steel                    | 1.5                      | 1               | 489030             |
| D-101        | Rotary Dryer                         | D: 2 m, L: 15 m, Power: 30kWh, carbon steel                           | 1.7                      | 1               | 177757             |
| F-101        | Plate & Frame filter                 | A: 27 m <sup>2</sup> , Power: 2.2 kWh, carbon steel                   | 1.7                      | 1               | 31174              |
| HX-101       | Shell and Tube heat exchanger        | A: 33 m <sup>2</sup> , Heat duty: 235 kWh, carbon steel               | 2.0                      | 1               | 25788              |
| HX-102       | Shell and Tube heat exchanger        | A: 48 m <sup>2</sup> , Heat duty: 1156 kWh, carbon steel              | 2.0                      | 1               | 32943              |
| HX-103       | Shell and Tube heat exchanger        | A: 40 m <sup>2</sup> , Heat duty: 300 kWh, carbon steel               | 2.0                      | 1               | 29174              |
| P-101 A/B    | Centrifugal Pump                     | Q: 59.2 m <sup>3</sup> /h, Head: 6.91 m, Power: 17 kW, carbon steel   | 2.8                      | 2               | 41384              |
| P-102 A/B    | Centrifugal Pump                     | Q: 59.40 m <sup>3</sup> /h, Head: 9.3 m, Power: 17 kWh, carbon steel  | 2.8                      | 2               | 45162              |
| MX-101       | In line mixer                        | Q: 143 m <sup>3</sup> /h, Power: 97 kWh, stainless steel              | 1.0                      | 1               | 51145              |
| MX-102       | In line mixer                        | Q: 74 m <sup>3</sup> /h, Power: 51 kWh, stainless steel               | 1.0                      | 1               | 26575              |
| MX-103       | In line mixer                        | Q: 148 m <sup>3</sup> /h, Power: 100kWh, stainless steel              | 1.0                      | 1               | 52832              |
| MX-104       | In line mixer                        | Q: 1.5 m <sup>3</sup> /h, Power: 2.5 kWh, stainless steel             | 1.0                      | 1               | 852                |
| T-101        | Process Water Tank                   | Vertical, V: 1463 m <sup>3</sup> , D: 7.75 m, H: 31.0 m, carbon steel | 1.7                      | 1               | 765817             |
| ST-102       | DDG's storage section                | Capacity: 2500 Tn, carbon steel                                       | 1.7                      | 1               | 48878              |
| Total A-100  |                                      |                                                                       |                          |                 | 2331955            |
| Area-200     |                                      |                                                                       | Lactic Acid Fermentation |                 |                    |
| Equipment ID | Equipment Title                      | Description                                                           | Install factor           | Number of Units | Installed Cost (€) |
| ST-201       | Seed Fermentor                       | V: 6 m <sup>3</sup> , Power: 2 kWh, stainless steel                   | 1.5                      | 1               | 175153             |
| ST-202       | Urea and culture ingredients storage | V: 84 m <sup>3</sup> , stainless steel                                | 1.8                      | 1               | 399199             |
| ST-203       | Sulfuric acid storage                | V: 196 m <sup>3</sup> , stainless steel                               | 1.8                      | 1               | 531432             |
| ST-204       | Ca(OH) <sub>2</sub> storage          | V: 112 m <sup>3</sup> , stainless steel                               | 1.8                      | 1               | 306625             |
| R-201        | Fixed Bed enzymatic reactor          | V: 80 m <sup>3</sup> , carbon steel                                   | 1.5                      | 1               | 3778000            |
| FX-201       | Lactic Acid Fermentor                | V: 310 m <sup>3</sup> , Power: 55kWh, stainless steel                 | 1.5                      | 1               | 3347791            |
| P-201        | Calcium Lactate Precipitation        | V: 310 m <sup>3</sup> , Power: 55kWh, stainless steel                 | 1.5                      | 1               | 3347791            |
| N-201        | Lactic acid recovery                 | V: 95 m <sup>3</sup> , Power: 15kWh, stainless steel                  | 1.5                      | 1               | 1267011            |
| C-201        | Centrifugal Separator                | D: 1 m, Speed: 900 rpm, Power: 75 kWh stainless steel                 | 1.7                      | 1               | 432798             |
| F-201        | Plate & Frame filter                 | A: 73 m <sup>2</sup> , Power: 2.2 kWh, stainless steel                | 1.7                      | 1               | 54333              |
| F-202        | Plate & Frame filter                 | A: 13.5 m <sup>2</sup> , Power: 2.2 kWh, stainless steel              | 1.7                      | 1               | 21490              |
| EX-201       | Stirred reactor                      | V: 2 m <sup>3</sup> , Power: 1kWh, stainless steel                    | 1.5                      | 1               | 97689              |
| T-201        | Transit Vessel                       | Vertical, V: 4 m <sup>3</sup> , D: 1.08 m, H: 4.34 m, stainless steel | 1.5                      | 1               | 44974              |

| <b>T-202</b>                                                              | Transit Vessel                | Vertical, V: 228 m <sup>3</sup> , D: 4.2 m, H: 16.7 m, stainless steel | 1.5                   | 1                      | 298144                    |
|---------------------------------------------------------------------------|-------------------------------|------------------------------------------------------------------------|-----------------------|------------------------|---------------------------|
| <b>P-201 A/B</b>                                                          | Centrifugal Pump              | Q: 116.1 m <sup>3</sup> /h, Head: 4.9 m, Power: 33kWh, stainless steel | 2.8                   | 2                      | 45012                     |
| <b>P-202 A/B</b>                                                          | Centrifugal Pump              | Q: 2.2 m <sup>3</sup> /h, Head: 0.7 m, Power: 1.5kWh, stainless steel  | 2.8                   | 2                      | 93681                     |
| <b>MX-201</b>                                                             | In line mixer                 | Q: 3.0 m <sup>3</sup> /h, Power: 3.5kWh, stainless steel               | 1.0                   | 1                      | 1430                      |
| <b>MX-202</b>                                                             | In line mixer                 | Q: 16.0 m <sup>3</sup> /h, Power: 12.5kWh, stainless steel             | 1.0                   | 1                      | 6161                      |
| <b>Total A-200</b>                                                        |                               |                                                                        |                       |                        | <b>14248714</b>           |
| <b>Area-300 Lactic acid dehydration and Acrylic acid recovery section</b> |                               |                                                                        |                       |                        |                           |
| <b>Equipment ID</b>                                                       | <b>Equipment Title</b>        | <b>Description</b>                                                     | <b>Install factor</b> | <b>Number of Units</b> | <b>Installed Cost (€)</b> |
| <b>P-301 A/B</b>                                                          | Centrifugal Pump              | Q: 13.4 m <sup>3</sup> /h, Head: 1.00 m, Power:6kWh, stainless steel   | 2.8                   | 2                      | 45669                     |
| <b>P-302 A/B</b>                                                          | Centrifugal Pump              | Q:8.5 m <sup>3</sup> /h, Head: 8,4 m, Power:2kWh, stainless steel      | 2.8                   | 2                      | 65288                     |
| <b>P-303 A/B</b>                                                          | Centrifugal Pump              | Q: 0.04 m <sup>3</sup> /h, Head: 7.22 m, Power:0.5kWh, stainless steel | 2.8                   | 2                      | 66973                     |
| <b>H-301</b>                                                              | Fired Heater                  | Heat duty: 2648 kWh, stainless steel                                   | 1.3                   | 1                      | 1468666                   |
| <b>R-301</b>                                                              | Fixed Bed reactor             | V: 2 m <sup>3</sup> , stainless steel                                  | 1.5                   | 1                      | 363737                    |
| <b>HX-301</b>                                                             | Shell and Tube heat exchanger | A: 288 m <sup>2</sup> , Heat duty: 9843 kWh, stainless steel           | 2.0                   | 1                      | 286200                    |
| <b>HX-302</b>                                                             | Shell and Tube heat exchanger | A: 55 m <sup>2</sup> , Heat duty: 708 kWh, stainless steel             | 2.0                   | 1                      | 84922                     |
| <b>HX-303</b>                                                             | Shell and Tube heat exchanger | A: 10.0 m <sup>2</sup> , Heat duty: 67 kWh, stainless steel            | 2.0                   | 1                      | 118556                    |
| <b>HX-304</b>                                                             | Shell and Tube heat exchanger | A: 1.0 m <sup>2</sup> , Heat duty: 5.6 kWh, stainless steel            | 2.0                   | 1                      | 9177                      |
| <b>HX-305</b>                                                             | Shell and Tube heat exchanger | A: 224 m <sup>2</sup> , Heat duty: 2215 kWh, carbon steel              | 2.0                   | 1                      | 109883                    |
| <b>TW-301</b>                                                             | Absorption column             | D: 0.3 m, H: 12.0 m, H <sub>packing</sub> : 9.5, stainless steel       | 3.0                   | 1                      | 66816                     |
| <b>TW-302</b>                                                             | Distillation Colum            | D: 0.76 m, H: 14 m, N: 13, stainless steel                             | 3.0                   | 1                      | 1081498                   |
| <b>TW-303</b>                                                             | L-L extraction Colum          | D: 1.25 m, H: 22 m, N: 25, stainless steel                             | 3.0                   | 1                      | 532224                    |
| <b>TW-304</b>                                                             | Distillation Colum            | D: 3.2 m, H: 38 m, N: 50, stainless steel                              | 3.0                   | 1                      | 6838272                   |
| <b>TW-305</b>                                                             | Distillation Colum            | D: 0.9 m, H: 14 m, N: 50, stainless steel                              | 3.0                   | 1                      | 783360                    |
| <b>MX-301</b>                                                             | In line mixer                 | Q: 24.0 m <sup>3</sup> /h, 18 kWh, stainless steel                     | 1.0                   | 1                      | 8925                      |
| <b>CP-301</b>                                                             | Centrifugal Compressor        | Power: 358 kWh, stainless steel                                        | 1.3                   | 1                      | 1061626                   |
| <b>ST-301</b>                                                             | Toluene storage               | V: 164m <sup>3</sup> , carbon steel                                    | 1.8                   | 1                      | 158722                    |
| <b>ST-302</b>                                                             | Acetaldehyde storage          | V: 53 m <sup>3</sup> , stainless steel                                 | 1.8                   | 1                      | 271091                    |
| <b>ST-303</b>                                                             | Acrylic acid storage          | V: 335 m <sup>3</sup> , stainless steel                                | 1.8                   | 1                      | 429226                    |
| <b>ST-304</b>                                                             | Lactic acid storage           | V: 7 m <sup>3</sup> , stainless steel                                  | 1.8                   | 1                      | 62545                     |
| <b>Total A-300</b>                                                        |                               |                                                                        |                       |                        | <b>13913374</b>           |
| <b>Installed Equipment</b>                                                |                               |                                                                        |                       |                        | <b>32145811</b>           |

**Table S2.** Equipment specification for bio-acrylic acid production from carob pod process at a capacity of 68 kton carob pod per year.

### S3. Estimation of the TCI

Components of the TCI

| Component                       | Value    | Base Case (x10 <sup>6</sup> €) |
|---------------------------------|----------|--------------------------------|
| <i>Direct Investment</i>        |          |                                |
| a) Equipment Cost (EC)          |          | 23.13                          |
| b) Installed equipment          |          | 32.14                          |
| c) Piping                       | 0.22*EC  | 5.09                           |
| d) Instrumentation              | 0.09* EC | 2.08                           |
| e) Electrical Installation      | 0.07* EC | 1.62                           |
| f) Land                         | 0.07* EC | 1.62                           |
| g) Buildings                    | 0.21* EC | 4.86                           |
| h) Utilities                    | 0.28* EC | 6.48                           |
| <i>Indirect Investment</i>      |          |                                |
| a) Construction engineering     | 0.38* EC | 8.79                           |
| b) Contractors fee              | 0.13* EC | 3.01                           |
| c) Contingency                  | 0.26* EC | 6.01                           |
| <b>Fixed Capital Investment</b> |          | <b>62.70</b>                   |
| <i>Working capital</i>          | 0.28*FCI | 17.55                          |
| <b>Total Capital Investment</b> |          | <b>80.22</b>                   |

**Table S3.** Factors applied for the calculation of the TCI.
